# THE AMERICAN JOURNAL OF PSYCHIATRY

---

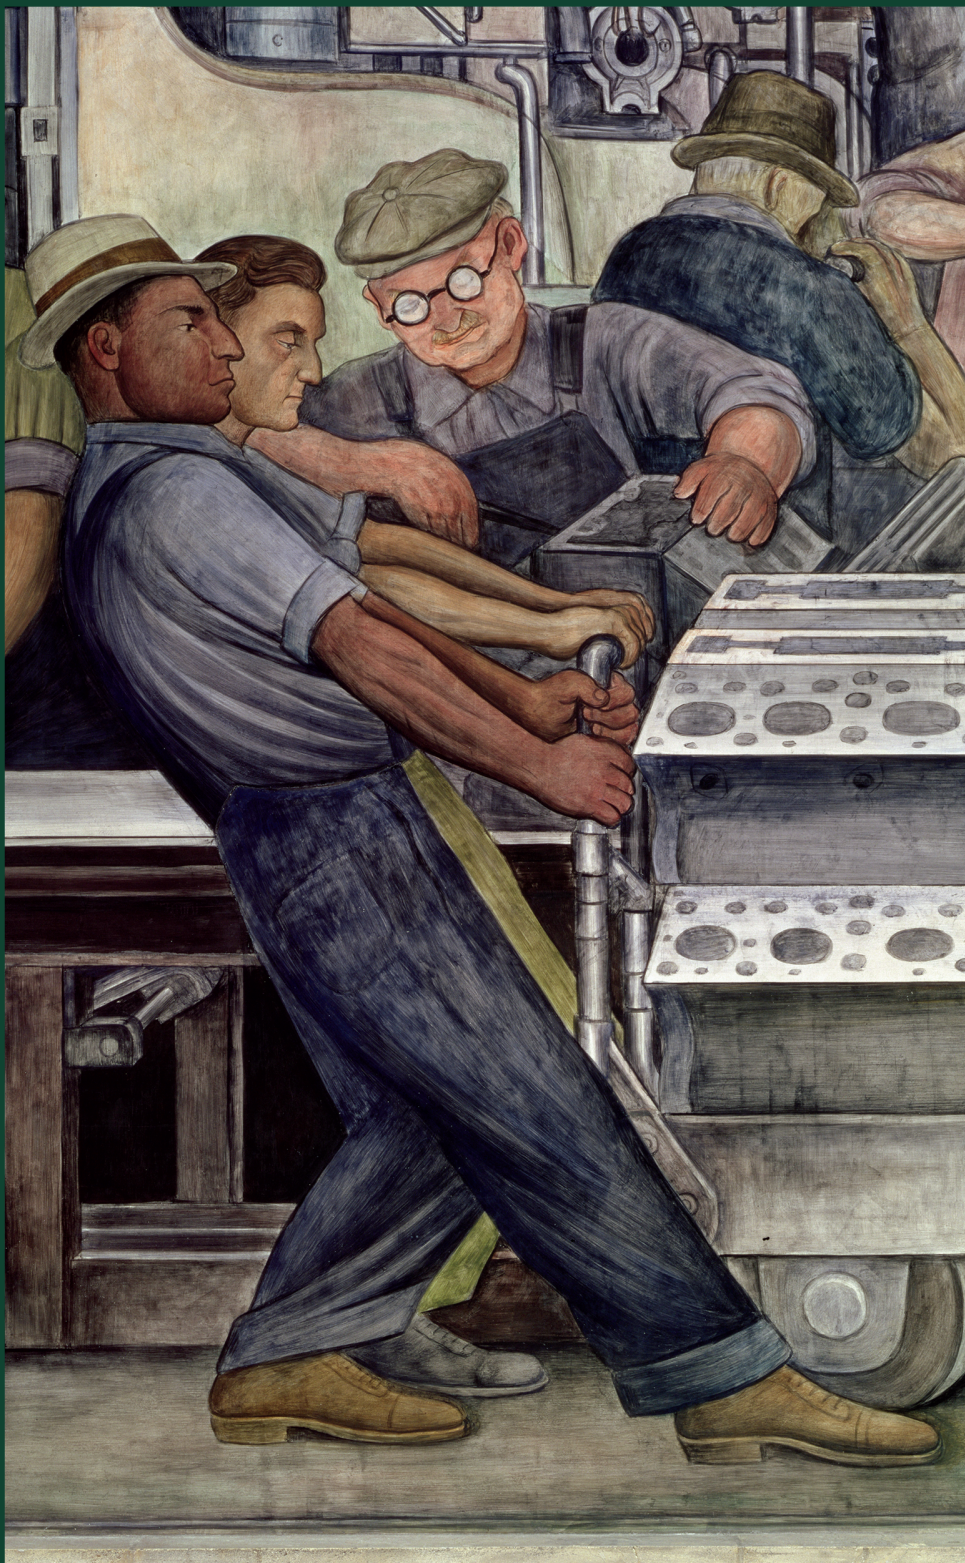

Relapse Duration, Treatment Intensity, and Brain Tissue Loss in Schizophrenia

Nancy C. Andreasen, M.D., Ph.D., et al. 609

Decreased Cortical Representation of Genital Somatosensory Field After Childhood Sexual Abuse

Christine M. Heim, Ph.D., et al. 616

Maintenance Cognitive-Behavioral Therapy and Manualized Psychoeducation in the Treatment of Recurrent Depression

Ulrich Stangier, Ph.D., et al. 624

◀ Increase in Work Productivity of Depressed Individuals With Improvement in Depressive Symptom Severity

Madhukar H. Trivedi, M.D., et al. 633

June 2013

Volume 170 • Number 6

---

Official Journal of the  
AMERICAN PSYCHIATRIC ASSOCIATION

---

[ajp.psychiatryonline.org](http://ajp.psychiatryonline.org)
