# THE AMERICAN JOURNAL OF PSYCHIATRY

## En este número

A30

### Perspectivas

#### Editoriales

- 571 **El efecto a largo plazo de la esquizofrenia sobre el cerebro: ¿Demencia precoz?**  
John A. Sweeney
- 574 **Correlatos neuroanatómicos del abuso sexual en la infancia: Identificando sustratos biológicos de los efectos ambientales sobre los fenotipos clínicos**  
María A. Oquendo, Jeffrey M. Miller, y M. Elizabeth Sublette
- 578 **Depresiones en el trabajo: Personalizar, colaborar o pagar el precio**  
John F. Greden
- 582 **Entendiendo las transiciones en el consumo de drogas ilícitas y en los trastornos por consumo de drogas**  
Carlos Blanco

#### Comentario

- 585 **Trastornos neurocognitivos en el DSM-5**  
Dan Blazer **Audio**
- 588 **La nueva ley de salud mental de China: Replanteando el tratamiento involuntario**  
Michael R. Phillips, Hanhui Chen, Kate Diesfeld, Bin Xie, Hui G. Cheng, Graham Mellsop, y Xiehe Liu

#### Tratamiento en Psiquiatría

- 592 **Autorización psiquiátrica para pacientes que han iniciado terapias basadas en interferón alfa**  
Francis E. Lotrich **Audio EMC**

#### Imágenes en Psiquiatría

- 598 **Opresión, depresión, y trabajo en los murales de Diego Rivera**  
Shannon Caspersen

#### Resúmenes y Reseñas

- 599 **“Selección espermatozoica egoísta”: Un mecanismo novedoso para la relación entre la edad avanzada de los progenitores y los trastornos del neurodesarrollo**  
Anne Goriely, John J. McGrath, Christina M. Hultman, Andrew O.M. Wilkie, y Dolores Malaspina  
**Audio EMC**

## Nuevas investigaciones

### Artículos

- 609 **Duración de las recaídas, intensidad del tratamiento y pérdida de tejidos cerebrales en la esquizofrenia: Un estudio longitudinal prospectivo de RMN**  
Nancy C. Andreasen, Dawei Liu, Steven Ziebell, Anvi Vora, y Beng-Choon Ho **Audio Editorial**
- 616 **Menor representación cortical del campo somatosensorial genital después de abuso sexual en la infancia**  
Christine M. Heim, Helen S. Mayberg, Tanja Mletzko, Charles B. Nemeroff, y Jens C. Pruessner  
**Audio Editorial**
- 624 **Terapia de mantenimiento cognitivo-conductual y psicoeducación manualizada en el tratamiento de la depresión recurrente: Un ensayo prospectivo, multicéntrico, aleatorizado y controlado**  
Ulrich Stangier, Christine Hilling, Thomas Heidenreich, Anne Katrin Risch, Arnd Barocka, Ralf Schlösser, Kai Kronfeld, Christian Ruckes, Hartmut Berger, Joachim Röschke, Florian Weck, Stephan Volk, Martin Hambrecht, Richard Serfling, Ralf Erkwow, Aglaja Stirn, Thomas Sobanski, y Martin Hautzinger **Audio Guías clínicas**
- 633 **Aumento en la productividad de personas deprimidas con mejoras en la severidad de los síntomas depresivos**  
Madhukar H. Trivedi, David W. Morris, Stephen R. Wisniewski, Ira Lesser, Andrew A. Nierenberg, Ella Daly, Benji T. Kurian, Bradley N. Gaynes, G.K. Balasubramani, y A. John Rush **Audio Editorial**
- 642 **Una evaluación de la advertencia de la FDA de no prescribir citalopram en dosis diarias que excedan 40 mg**  
Kara Zivin, Paul N. Pfeiffer, Amy S.B. Bohnert, Dara Ganoczy, Frederic C. Blow, Brahmajee K. Nallamothu, y Helen C. Kales **Audio Guías clínicas**
- 651 **Moderadores del resultado de la depresión en edad avanzada: Un meta-análisis a nivel del paciente**  
J. Craig Nelson, Kevin L. Delucchi, y Lon S. Schneider  
**Audio**
- 660 **Transiciones en el consumo de drogas ilícitas en un período de 3 años: Un análisis prospectivo de una muestra de la población general**  
Wilson M. Compton, Deborah A. Dawson, Kevin P. Conway, Marc Brodsky, y Bridget F. Grant **Editorial**

- 671 **Experiencias cognitivas reportadas por pacientes con trastorno límite de la personalidad y sujetos de comparación con Eje II: Un estudio prospectivo de seguimiento de 16 años**  
Mary C. Zanarini, Frances R. Frankenburg, Michelle M. Wedig, y Garrett M. Fitzmaurice **EMC**

## Comunicados y actualizaciones

### Cartas al Editor

- 680 “¿Una rosa es una rosa es una rosa?”  
Pérdida de peso sostenida después del tratamiento con un agonista del receptor GLP-1 en un paciente obeso con esquizofrenia y diabetes tipo 2  
Naltrexona inyectable mensualmente para la ludopatía  
Estudio de asociación genómica del deterioro cognitivo en esquizofrenia

### Reseñas Bibliográficas

- 685 Witness to an Extreme Century: A Memoir [Testigo de un siglo extremo: Una Memoria]  
Bad Souls: Madness and Responsibility in Modern Greece [Almas malas: locura y responsabilidad en la Grecia moderna]  
The Red Book Liber Novus: A Reader's Edition [El libro rojo — Liber novus]  
Women's Bodies in Psychoanalysis [Cuerpos femeninos en psicoanálisis]
- 689 **Corrections**
- 690 **Libros Recibidos**

### Otros temas de interés

- 691 **Educación Médica Continuada**  
A19 **Directivos de la American Psychiatric Association**  
A22 **Calendario**  
A28 **Contenidos del *British Journal of Psychiatry***  
A29 **Contenidos del *Shanghai Archives of Psychiatry***

### Cubierta

Trivedi et al. (p. 633) reportan que reducir la severidad de los síntomas en personas con depresión mayor puede mejorar significativamente el funcionamiento ocupacional de éstas, pero no garantiza que recuperen completamente el funcionamiento premórbido. Algunas características sociodemográficas y clínicas pueden ser factores importantes para que un paciente vuelva a ser totalmente productivo. La imagen es el mural *Detroit Industry* (fresco, 1933), de Diego Rivera, en la fachada norte del Detroit Institute of Arts; reproducido con el permiso de Bridgeman Art Library International.

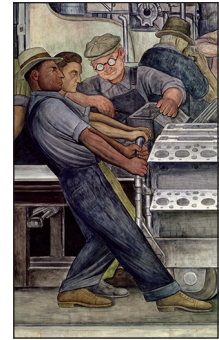

#### Audio

artículo en AJP Audio: archivo .mp3 descargable de [ajp.psychiatryonline.org](http://ajp.psychiatryonline.org)

#### Guías clínicas

este artículo ofrece guías clínicas (ver página “En este Número” o al final del artículo)

#### EMC

existe un curso en línea que cubre los contenidos de este artículo para los suscriptores del programa de cursos de EMC del AJP

#### Editorial

este artículo se discute en uno de los editoriales de este número

This issue's Spanish Table of Contents is presented in collaboration with the Office of Global Health, UMDNJ-Robert Wood Johnson Medical School

Translation courtesy of  
Sergi Casals, M.S.  
Garuna Editors ([www.garunaeditors.com](http://www.garunaeditors.com)), Barcelona, Spain  
Carlos Lopez Jaramillo,  
Universidad de Antioquia, Medellin, Colombia  
and  
Javier I. Escobar, M.Sc.  
UMDNJ-Robert Wood Johnson Medical School
