# THE AMERICAN PSYCHIATRIC ASSOCIATION

1000 Wilson Blvd., Suite 1825, Arlington, VA 22209-3901  
(888) 357-7924 (toll-free inside the U.S. and Canada) / (703) 907-7300  
web site: [www.psychiatry.org](http://www.psychiatry.org) • e-mail: [apa@psych.org](mailto:apa@psych.org)

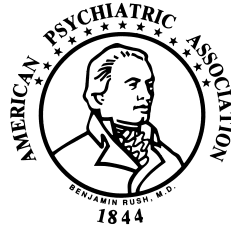

## OFFICERS 2012–2013

|                 |                            |
|-----------------|----------------------------|
| President       | Dilip V. Jeste, M.D.       |
| President-Elect | Jeffrey A. Lieberman, M.D. |
| Treasurer       | David Fassler, M.D.        |
| Secretary       | Roger Peele, M.D.          |

## ASSEMBLY

|               |                        |
|---------------|------------------------|
| Speaker       | R. Scott Benson, M.D.  |
| Speaker-Elect | Melinda L. Young, M.D. |
| Recorder      | Jenny L. Boyer, M.D.   |

## MEDICAL DIRECTOR'S OFFICE

|                          |                            |
|--------------------------|----------------------------|
| Medical Director and CEO | James H. Scully, Jr., M.D. |
|--------------------------|----------------------------|

## BOARD OF TRUSTEES

|                          |                            |
|--------------------------|----------------------------|
| Jeffrey Akaka, M.D.      | Judith F. Kashtan, M.D.    |
| Carol A. Bernstein, M.D. | Molly K. McVoy, M.D.       |
| Brian Crowley, M.D.      | James E. Ninger, M.D.      |
| Jeffrey Geller, M.D.     | John M. Oldham, M.D.       |
| Marc David Graff, M.D.   | Alan F. Schatzberg, M.D.   |
| James A. Greene, M.D.    | Alik S. Widge, M.D., Ph.D. |

## PUBLISHER

Rebecca D. Rinehart

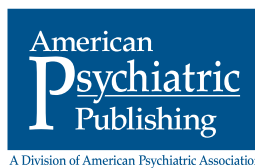

The American Journal of Psychiatry is online at [ajp.psychiatryonline.org](http://ajp.psychiatryonline.org)

APA Officers and Chairpersons for 2013–2014 took office at the conclusion of the APA Annual Meeting, after this issue went to press. The July issue of *The American Journal of Psychiatry* will feature these officeholders.

# THE AMERICAN PSYCHIATRIC ASSOCIATION

## Chairpersons of Councils, Commissions, Committees, and Task Forces

### Standing Committees

---

**Bylaws**

Eric M. Plakun, M.D.

**Elections**

Robert E. Kelly, Jr., M.D.

**Ethics**

Richard D. Milone, M.D.

**Finance and Budget**

Frank W. Brown, M.D.

**Audit**

David Fassler, M.D.

**Investment Oversight**

Larry R. Faulkner, M.D.

**Joint Reference**

Jeffrey A. Lieberman, M.D.

**Membership**

Joseph Ezra V. Rubin, M.D.

**Nominating**

John M. Oldham, M.D.

**Tellers**

Tanya Nayyirah Alim, M.D.

---

**Council on Addiction Psychiatry**

---

John A. Renner, M.D.

---

**Council on Advocacy and Government Relations**

---

Robert Paul Cabaj, M.D.

**Advocacy and Litigation Funding**

Renee L. Binder, M.D.

---

**Council on Children, Adolescents, and Their Families**

---

Louis J. Kraus, M.D.

**Agnes Purcell McGavin Award****Blanche F. Ittleson Research Award**

Karen Dineen Wagner, M.D.

---

**Council on Communications**

---

Jeffrey A. Borenstein, M.D.

---

**Council on Geriatric Psychiatry**

---

Brent P. Forester, M.D.

---

**Council on Healthcare Systems and Financing**

---

Sul Ross Olen Thorward, M.D.

**Reimbursement for Psychiatric Care**

Bruce J. Schwartz, M.D.

**RBRVS, Codes and Reimbursement**

Ronald M. Burd, M.D.

---

**Council on Medical Education and Lifelong Learning**

---

Sandra Sexson, M.D.

**APA Public Psychiatry Fellowship Selection Committee**

Stephen M. Goldfinger, M.D.

**APA/SAMHSA Minority Fellowship Selection and Advisory**

Toi B. Harris, M.D.

**Scientific Program**

Joseph A. Cheong, M.D.

**Scientific Program Committee of the Institute on Psychiatric Services**

David Alan Pollack, M.D.

**Task Force to Update the Ethics Annotations**

Laura W. Roberts, M.D.

**Vestermark Award Committee**

Frederick G. Guggenheim, M.D.

---

**Council on Minority Health and Health Disparities**

---

Sandra C. Walker, M.D.

---

**Council on Psychiatry And Law**

---

Patricia R. Recupero, M.D., J.D.

**Isaac Ray/Human Rights Award**

Steven K. Hoge, M.D.

**Judicial Action**

Paul S. Appelbaum, M.D.

**Manfred S. Guttmacher Award**

Rebecca W. Brendel, M.D., J.D.

---

**Council on Psychosomatic Medicine  
(Consultation Liaison Psychiatry)**

---

Joel E. Dimsdale, M.D.

---

**Council on Research and Quality Care**

---

Joel Yager, M.D.

**Electronic Health Records**

Steven Roy Daviss, M.D.

**Psychiatric Dimensions of Disasters**

Robert J. Ursano, M.D.

**Research Awards**

Lewis L. Judd, M.D.

**Steering Committee on Practice Guidelines**

Joel Yager, M.D.

**Task Force on DSM-V**

David J. Kupfer, M.D.

**Task Force to Revise the Practice of Electroconvulsive Therapy**

Sarah H. Lisanby, M.D.

APA Officers and Chairpersons for 2013–2014 took office at the conclusion of the APA Annual Meeting, after this issue went to press. The July issue of *The American Journal of Psychiatry* will feature these officeholders.

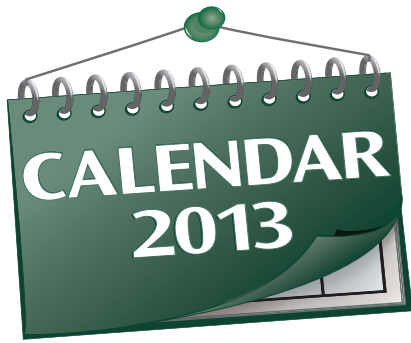

For free listing of your organization's official annual or regional meeting, please send us the following information: sponsor, location, inclusive dates, type and number of continuing education credits (if available), and the name, address, and telephone number of the person or group to contact for more information. In order for an event to appear in our listing, all notices and changes must be received at least 6 months in advance of the meeting and should be addressed to:

**Calendar, American Journal of Psychiatry, 1000 Wilson Boulevard, Suite 1825, Arlington, VA 22209-3901, [swestrade@psych.org](mailto:swestrade@psych.org) (e-mail).**

Because of space limitations, only listings of meetings of the greatest interest to Journal readers may be included.

---

## JUNE

**June 6–9**, 4th World Congress on ADHD: From Childhood to Adult Disease, Milan, Italy. Contact Congress Organizer, +49-40-670 88 20 (tel); [adhd2013@cpo-hanser.de](mailto:adhd2013@cpo-hanser.de) (email); [www.adhd-congress.org](http://www.adhd-congress.org) (web site).

**June 20–22**, Association of Directors of Medical Student Education in Psychiatry meeting. Williamsburg Lodge, Williamsburg, Va. For registration information, go to [http://www.admsep.org/upcoming\\_meeting.php](http://www.admsep.org/upcoming_meeting.php).

---

## JULY

**July 8–13**, 28th International Congress of Applied Psychology, Palais des Congrès de Paris, France. Contact: [exh@icap2014.com](mailto:exh@icap2014.com) (email); [www.icap2014.com](http://www.icap2014.com) (web site).

---

## SEPTEMBER

**September 19–22**, North Carolina Psychiatric Association conference "Side Effects: Adherence, Tolerability and Insight in Psychiatric Treatment," Asheville, N.C. Contact: 919-859-3370 (tel); [info@ncpsychiatry.org](mailto:info@ncpsychiatry.org).

org (email); [www.ncpsychiatry.org/annual-meeting-scientific-session](http://www.ncpsychiatry.org/annual-meeting-scientific-session) (web site).

**September 25–27**, 9th Congress of the International Neuropsychiatric Association, Chicago, Ill. [www.inawebsite.org](http://www.inawebsite.org) (web site).

---

## OCTOBER

**October 10–13**, 65th Institute on Psychiatric Services, Philadelphia, Pa. Contact: APA Annual Meetings Dept., 1000 Wilson Blvd, Suite 1825, Arlington, VA 22209; <http://www.psychiatry.org/learn/institute-on-psychiatric-services> (web site).

**October 16–19**, annual meeting of the Association for Academic Psychiatry, Charleston, S.C. [www.academicpsychiatry.org](http://www.academicpsychiatry.org) (web site).

**October 17–21**, XXI World Congress of Psychiatric Genetics, Boston, Mass. Contact congress organizer: Parthenon Management Group, 5034A Thoroughbred Lane, Brentwood, TN 37027; (615) 324-2365 (tel); [info@parthenonmanagementgroup.com](mailto:info@parthenonmanagementgroup.com) (email); [www.wcp2013.org](http://www.wcp2013.org) (web site).

---

## FEBRUARY 2014

**February 16–20**, 25th Annual Meeting of the American Neuropsychiatric Association, Seattle, Wash. [www.anpaonline.org](http://www.anpaonline.org) (web site).

---

## MARCH 2014

**March 12–15**, 43rd Annual Meeting of the American Association of Directors of Psychiatric Residency Training, Tucson, Ariz. [www.aadpr.org](http://www.aadpr.org) (web site).

---

## MAY 2014

**May 3–7**, 167th Annual Meeting, American Psychiatric Association, New York, NY. Contact: APA Annual Meetings Dept., 1000 Wilson Blvd, Suite 1825, Arlington, VA 22209; (703) 907-7815 (tel); <http://www.psych.org/learn/annual-meeting> (web site).

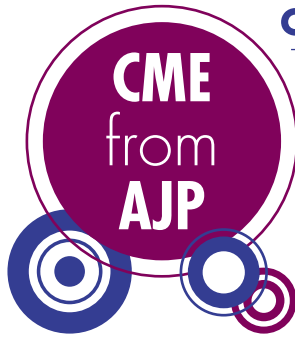

## Continuing Medical Education

Three articles in this issue form the basis of a short course with questions that can be answered for up to 1 *AMA PRA Category 1 Credit*<sup>™</sup> each by visiting <http://psychiatryonline.org/cme.aspx> and clicking on the “American Journal of Psychiatry” tab.

CME credit is issued only online, and a paid subscription to the AJP CME course program is required.

This month’s courses appear on pages 691–694.

FREE AUDIO!

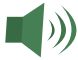

### Have You Heard?

You can listen to highlights of *The American Journal of Psychiatry* by downloading a monthly free .mp3 audio file from our web site (<http://ajp.psychiatryonline.org/audio.aspx#>) or by subscribing to the AJP Audio podcast at iTunes or other feed reader. Presented by Deputy Editor Dr. Susan Schultz or by Executive Editor Michael Roy, each month’s audio lasts approximately 30 minutes and covers several research articles, the Treatment in Psychiatry feature, and one or two editorials.

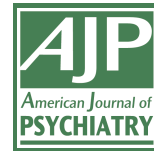

Coming in the July 2013 issue\*

## THE AMERICAN JOURNAL OF PSYCHIATRY

### Childhood Trauma and Psychosis in a Prospective Cohort Study: Cause, Effect, and Directionality

I. Kelleher, H. Keeley, P. Corcoran, H. Ramsay, C. Wasserman, V. Carli,  
M. Sarchiapone, C. Hoven, D. Wasserman, and M. Cannon

### D-Cycloserine as an Augmentation Strategy With Cognitive-Behavioral Therapy for Social Anxiety Disorder

S.G. Hofmann, J.A.J. Smits, D. Rosenfield, N. Simon, M.W. Otto, A.E. Meuret,  
L. Marques, A. Fang, C. Tart, and M.H. Pollack

### Antidepressant Medication Augmented With Cognitive-Behavioral Therapy for Generalized Anxiety Disorder in Older Adults

J.L. Wetherell, A.J. Petkus, K.S. White, H. Nguyen, S. Kornblith, C. Andreescu, S. Zisook, and E.J. Lenze

### Psychotic Experiences and Psychotic Disorders at Age 18 in Relation to Psychotic Experiences at Age 12 in a Longitudinal Population-Based Cohort Study

S. Zammit, D. Kounali, M. Cannon, A.S. David, D. Gunnell, J. Heron, P.B. Jones,  
S. Lewis, S. Sullivan, D. Wolke, and G. Lewis

\*Can't wait? Visit [ajp.psychiatryonline.org/AJPInAdvance.aspx](http://ajp.psychiatryonline.org/AJPInAdvance.aspx) to see all articles uploaded in advance of print!

# The Residents' JOURNAL

## The Residents' JOURNAL

a publication of  
The American Journal of Psychiatry

April 2013

Volume 8

Issue 4

### Inside

- 2 Moral Injury: An Emerging Concept in Combat Trauma  
George Loeffler, M.D.
- 4 Methoxetamine: The Rise of a Ketamine Analogue "Legal High"  
Cassandra Craig, B.Sc.  
George Loeffler, M.D.
- 6 Depression, Suicide, and Ketamine  
John Burger, M.D.  
George Loeffler, M.D.
- 9 Use of "Bath Salts" Among Members of the United States Military: A Case Report With Discussion  
Daniel G. Allen, M.D.  
Wander S. Segura, M.D.  
Rebecca R. Burson, D.O.
- 11 Deployment Stress, Dextromethorphan, Ketamine, and Pharmacologic Interactions: A Multifactorial Presentation of Mania  
Philip Y.T. Liu, M.D.  
Rebecca R. Burson, D.O.
- 13 Virtual Reality Exposure Therapy for the Treatment of Combat Posttraumatic Stress Disorder  
Ryan Richmond, B.S.
- 15 Effects of Military Deployment on Children  
Nicole Garber, M.D.
- 16 Editor's Note

### In This Issue

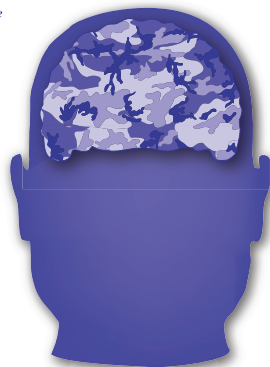

This issue of the *Residents' Journal* focuses on the theme of military psychiatry. The issue begins with an article by the Guest Section Editor, George Loeffler, M.D., on the emerging concept of moral injury. In a case report, Daniel G. Allen, M.D., Wander S. Segura M.D., and Rebecca R. Burson, D.O., describe the effects of methylenedioxypropylrovalerone use in an active-duty service member, as well as the unique challenges use of this substance presents to both service members and military health care providers. Philip Y.T. Liu, M.D., and Dr. Burson present a case report of first-episode substance-induced mania with psychotic features in a decorated soldier evacuated from a combat-stressed environment. Ryan Richmond, B.S., discusses virtual reality exposure therapy for treatment of combat posttraumatic stress disorder. Last, Nicole Garber, M.D., presents data on the effects of military deployment on children.

Editor-in-Chief  
Monifa Seawell, M.D.

Senior Editor  
Sarah M. Fayad, M.D.

Associate Editor  
Arshya Vahabzadeh, M.D.

Guest Section Editor  
George Loeffler, M.D.

Editors Emeriti  
Sarah B. Johnson, M.D.  
Molly McVoy, M.D.

Joseph M. Cerimele, M.D.

Staff Editor  
Angela Moore

*The Residents' Journal* accepts manuscripts authored by medical students, resident physicians, and fellows. To submit your paper, please visit the manuscript submission site at [mc.manuscriptcentral.com/appi-ajp](http://mc.manuscriptcentral.com/appi-ajp) and either create an account or use your existing account. For manuscript type, select "Residents." Then follow the instructions to upload your manuscript. Residents who are interested in participating as Guest Section Editors should e-mail *The Residents' Journal* Editor-in-Chief Monifa Seawell at [mseawell@med.wayne.edu](mailto:mseawell@med.wayne.edu).

*The Residents' Journal* is sent free-of-charge to all psychiatry residents. Anyone interested in being included on the distribution list should contact Angela Moore, *The Residents' Journal* staff editor at [ajp@psych.org](mailto:ajp@psych.org) with "Subscribe to Residents' Journal" in the subject line.

To access the complete *Residents' Journal* archives, visit [ajp.psychiatryonline.org/residents\\_journal.aspx](http://ajp.psychiatryonline.org/residents_journal.aspx)

# The American Journal of PSYCHIATRY

4 of Journal Watch  
Psychiatry's  
10 "Top Stories of 2012"  
appeared in AJP!  
No other journal had  
multiple appearances!

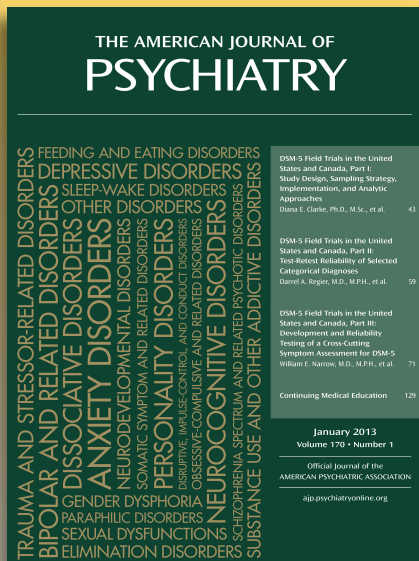

Official Journal of the  
American Psychiatric Association

Edited by Robert Freedman, M.D.

- *The American Journal of Psychiatry* (AJP) has an Impact Factor of 12.539 according to the 2011 Journal Citation Reports® (Thomson Reuters, 2012), placing it 2nd among the 129 journals in psychiatry while still remaining the far-and-away leader in total citations.
- *The American Journal of Psychiatry* is also the #2 journal in psychiatry in terms of immediacy according to Thomson Scientific's Immediacy Index. This important performance metric is calculated by dividing the number of citations to articles published in a given year by the number of articles published in that year.
- A poll conducted by the BioMedical & Life Sciences Division of The Special Libraries Association identified the 100 most influential journals in all of Biology & Medicine over the last 100 years. *The American Journal of Psychiatry* was among those honored, the only psychiatry/psychology journal represented.

No other psychiatric journal reaches more psychiatrists with greater impact or immediacy than the one the overwhelming majority of psychiatrists considers essential: AJP.

**Latest  
IMPACT FACTOR 12.539!**

ISSN 0002-953X • [ajp.psychiatryonline.org](http://ajp.psychiatryonline.org)  
To order a subscription, visit [www.appi.org](http://www.appi.org).

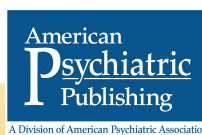

The *First* and *Last* Word in Psychiatry  
[www.appi.org](http://www.appi.org) • 1-800-368-5777 • 703-907-7322

Priority Code AH1303

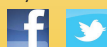

## Contents

- A17 **Editorial Board**  
A19 **Highlights of this issue**

### Editorials

- 319 **The future of academic psychiatry may be social**  
S. Priebe, T. Burns and T. K. J. Craig
- 321 **Fetal antipsychotic exposure in a changing landscape: seeing the future**  
K. M. Abel
- 323 **Ode to Anxiety – poems by doctors**  
Ankur Sharma
- 324 **Attempted suicide v. non-suicidal self-injury: behaviour, syndrome or diagnosis?**  
A. M. Butler and K. Malone
- 326 **Non-suicidal self-injury v. attempted suicide: new diagnosis or false dichotomy?**  
N. Kapur, J. Cooper, R. C. O'Connor and K. Hawton

### Review article

- 329 **Late-life depression and risk of vascular dementia and Alzheimer's disease: systematic review and meta-analysis of community-based cohort studies**  
B. S. Diniz, M. A. Butters, S. M. Albert, M. A. Dew and C. F. Reynolds 3rd

- 335 **Expressed emotion – in 100 words**  
Julian Leff

### Papers

- 336 **Influence of problematic child–teacher relationships on future psychiatric disorder: population survey with 3-year follow-up**  
I. A. Lang, R. Marlow, R. Goodman, H. Meltzer and T. Ford
- 342 **Prevalence of reactive attachment disorder in a deprived population**  
H. Minnis, S. Macmillan, R. Pritchett, D. Young, B. Wallace, J. Butcher, F. Sim, K. Baynham, C. Davidson and C. Gillberg
- 347 **Maternal depression, antidepressant use in pregnancy and Apgar scores in infants**  
H. M. Jensen, R. Grøn, Ø. Lidgaard, L. H. Pedersen, P. K. Andersen and L. V. Kessing
- 352 **Bright light therapy for symptoms of anxiety and depression in focal epilepsy: randomised controlled trial**  
S. Baxendale, J. O'Sullivan and D. Heaney
- 357 **Joint crisis plans for people with borderline personality disorder: feasibility and outcomes in a randomised controlled trial**  
R. Borschmann, B. Barrett, J. M. Hellier, S. Byford, C. Henderson, D. Rose, M. Slade, K. Sutherby, G. Szmukler, G. Thornicroft, J. Hogg and P. Moran

- 364 **A Message – poem**  
Olive M. Ritch

- 365 **Risk assessment and shared care planning in out-patient forensic psychiatry: cluster randomised controlled trial**  
N. A. C. Troquete, R. H. S. van den Brink, H. Beintema, T. Mulder, T. W. D. P. van Os, R. A. Schoevers and D. Wiersma

- 371 **On Bowlby's 'trilogy' – reflections**  
Jeremy Holmes

- 372 **Postcards from the EDGE: 5-year outcomes of a randomised controlled trial for hospital-treated self-poisoning**  
G. L. Carter, K. Clover, I. M. Whyte, A. H. Dawson and C. D'Este

### Short report

- 381 **Cerebrospinal fluid anandamide levels, cannabis use and psychotic-like symptoms**  
C. J. A. Morgan, E. Page, C. Schaefer, K. Chatten, A. Manocha, S. Gulati, H. V. Curran, B. Brandner and F. M. Leweke

### Columns

- 383 **Correspondence**  
387 **Book reviews**  
388 **Contents of *Advances in Psychiatric Treatment***  
389 **Contents of the *American Journal of Psychiatry***  
390 **From the Editor's desk**

### Cover picture

*Weekend Cruiser* (2005). George Widener (b. 1962). Pen & ink on found paper napkins 97cm × 144cm. Photo: Arnaud Conne. Collection de l'Art Brut, Lausanne, Switzerland.

George Widener is an American outsider artist who accepts his diagnosis of Asperger syndrome. He is now the most prodigious calendar calculating savant alive since the death of Kim Peek (who inspired the 'Rain Man'). He writes:

'To count in a dream: listen to the rythem [sic] inside, see every "1" as a Sunday, every "2" as a Monday, "3" equals Tuesday, "4" equals Wednesday, "5" equals Thursday, "6" equals Friday, "7" equals Saturday; then the months will come to you as you go through a century; to get to the new dream, you must start over, you must RESET the days. . . .'

*Weekend Cruiser* is on permanent display at the Collection de l'Art Brut, Lausanne, Switzerland. George Widener is represented in the UK by Henry Boxer. For more information visit <http://www.outsiderart.co.uk/widener.html>

Submitted by Dr Joanna Bredski

We are always looking for interesting and visually appealing images for the cover of the *Journal* and would welcome suggestions or pictures, which should be sent to Dr Allan Beveridge, British Journal of Psychiatry, 17 Belgrave Square, London SW1X 8PG, UK or [bjp@rcpsych.ac.uk](mailto:bjp@rcpsych.ac.uk).

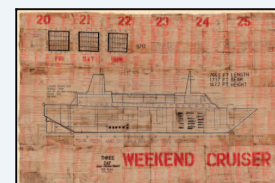

## EDITORIAL

**Comorbidity of mental and physical diseases: a main challenge for medicine of the 21st century**

doi: 10.3969/j.issn.1002-0829.2013.02.002

## META-ANALYSIS

**Prevalence of autism spectrum disorders among children in China: a systematic review**

doi: 10.3969/j.issn.1002-0829.2013.02.003

## REVIEW

**Neuroimaging studies in patients with obsessive-compulsive disorder in China**

doi: 10.3969/j.issn.1002-0829.2013.02.004

## ORIGINAL ARTICLES

**Methodology of China's national study on the evaluation, early recognition, and treatment of psychological problems in the elderly: the China Longitudinal Aging Study (CLAS)**

doi: 10.3969/j.issn.1002-0829.2013.02.005

**Relationship of changes in cognitive and depressive symptoms during antidepressant treatment of individuals with geriatric depression and their relationship to the APOE epsilon 4 allele**

doi: 10.3969/j.issn.1002-0829.2013.02.006

**Efficacy and safety of generic escitalopram versus Lexapro in the treatment of major depression: a multicenter double-blinded randomized controlled trial**

doi: 10.3969/j.issn.1002-0829.2013.02.007

## COMMENTARY

**Pesticides availability and medically serious suicide attempts in China**

doi: 10.3969/j.issn.1002-0829.2013.02.008

## FORUM: MILD COGNITIVE IMPAIRMENT

**Mild cognitive impairment: a concept useful for early detection and intervention of dementia**

doi: 10.3969/j.issn.1002-0829.2013.02.009

## CASE REPORT

**Case Report of Rapid-eye-movement (REM) sleep behavior disorder**

doi: 10.3969/j.issn.1002-0829.2013.02.010

## BIostatistics in Psychiatry

**The statistics of suicide**

doi: 10.3969/j.issn.1002-0829.2013.02.011
